# Supplementary material for: Climate sensitivity estimates – sensitivity to radiative forcing timeseries and observational data
Source: Copernicus journal article supplement (doi:10.5194/esd-2017-119), 2017-12-19
Supplement: Supplementary file 1 [file esd-2017-119-supplement.pdf]

**Supplementary material:**

## **Climate sensitivity estimates – sensitivity to radiative forcing time series and observational data**

Ragnhild Bieltvedt Skeie<sup>1</sup>, Terje Berntsen<sup>1,2</sup>, Magne Aldrin<sup>3</sup>, Marit Holden<sup>3</sup>, and Gunnar Myhre<sup>1</sup>

<sup>1</sup>CICERO-Center for International Climate and Environmental Research – Oslo, PB. 1129 Blindern, 0318 Oslo, Norway.

<sup>2</sup>Department of Geosciences, University of Oslo, PB. 1047 Blindern, 0316 OSLO, Norway.

<sup>3</sup>Norwegian Computing Center, PB. 114 Blindern, 0314 Oslo, Norway

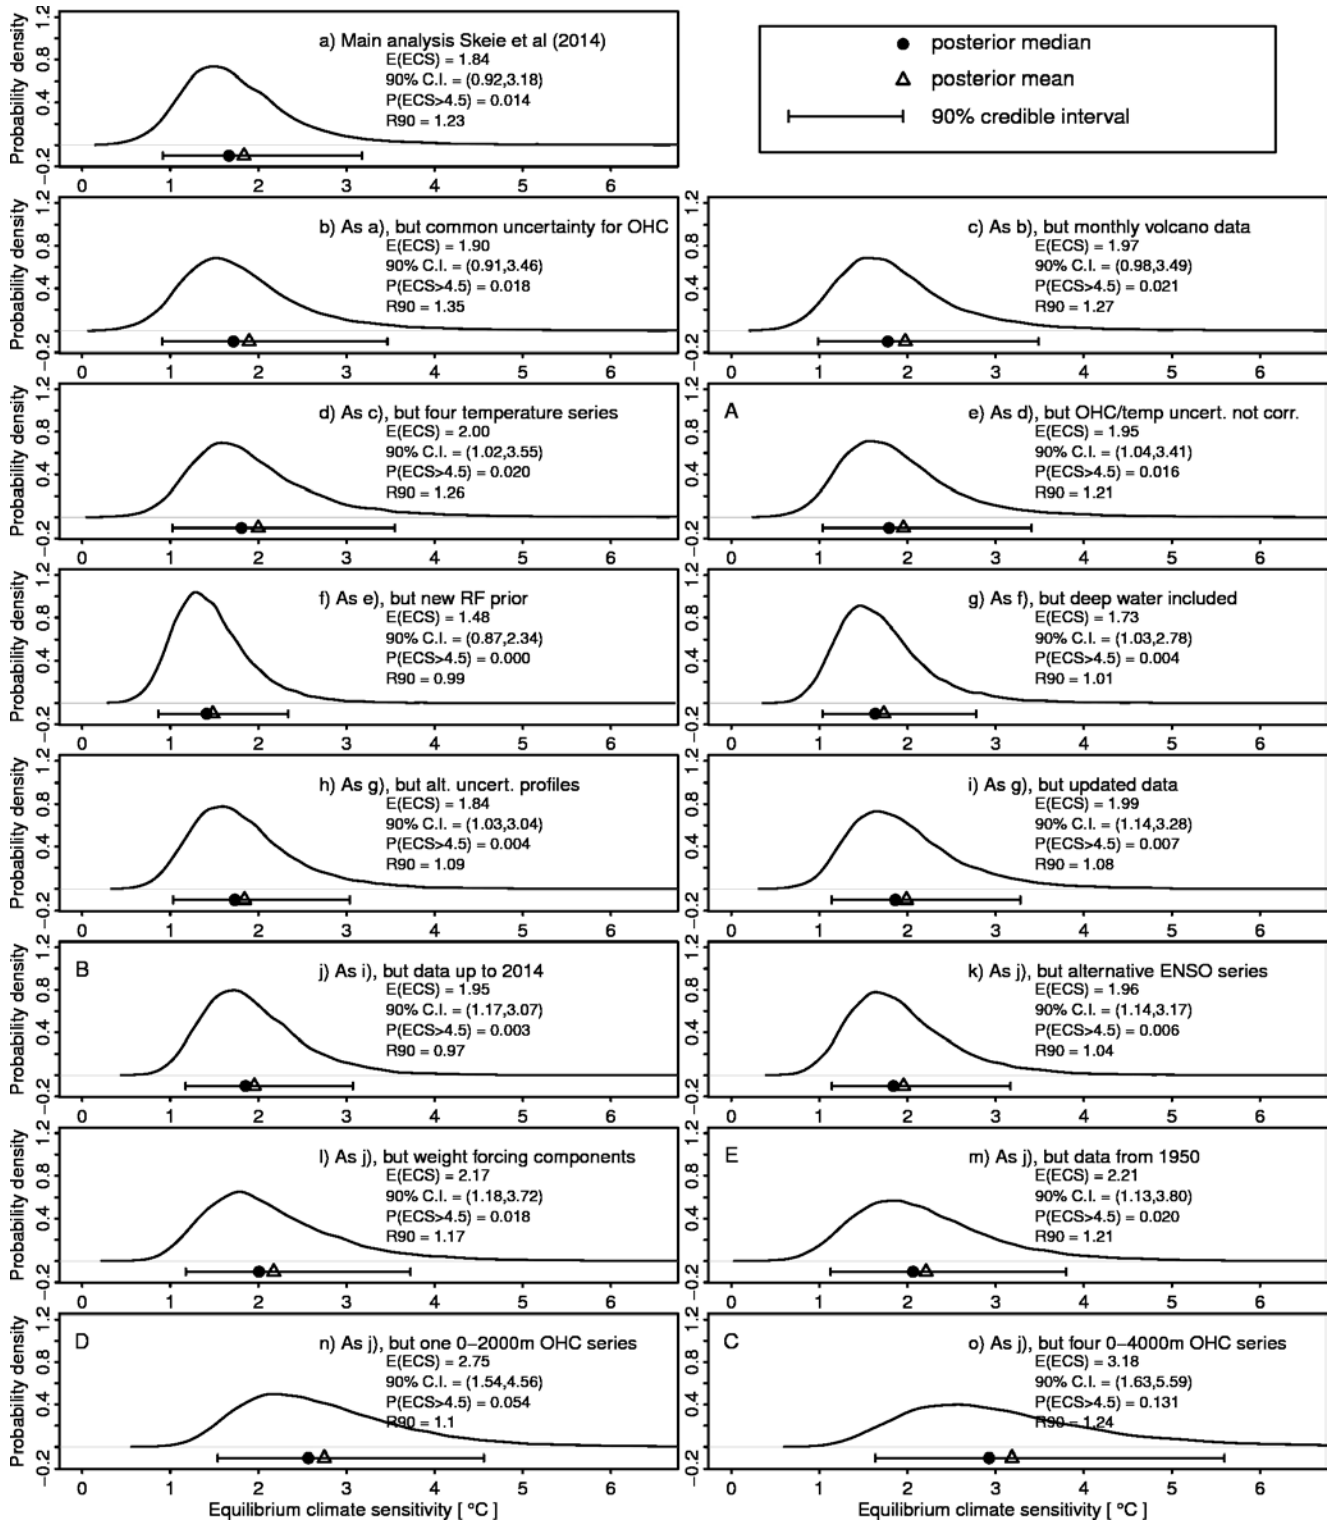

Figure S1. Posterior distributions for the ECS for all the analyses in this work. In (a) the main results from Skeie et al. (2014), (b) assumed a common observational uncertainty profile for the OHC data, (c) replaced yearly volcanic forcing with monthly forcing data, (d) included an additional data series for hemispheric temperature, (e) assume zero correlation for the temperature and OHC observational errors which is the starting point in the main text (case A), (f) replaced the original forcing priors with forcing priors from IPCC AR5 (g) included ORAS4 data above and below 700 meter (h) use an alternative uncertainty profile for the deep ocean data, (i) use updated observational data, (j) use observational data up to

and including 2014 (case B), **(k)** using an alternative ENSO index, **(l)** use different weights for the forcing components (see Text S3), **(m)** exclude observational data prior to 1950 (case E), **(n)** use only Levitus2000 OHC data (case D) and **(o)** use four total OHC observational time series but without separating above and below 700 meter (case C). The estimated mean of ECS, the 90% C.I. and the probability of ECS being larger than 4.5°C are given in the text box of each panel as well as the relative uncertainty measure R90 defined as the width of the 90% C.I. divided by the posterior mean. The 90% C.I. (the error bar) and estimated posterior mean (triangle) and median (black dot) are also indicated in each panel. The upper-case letter in the upper left corner indicates the main cases.

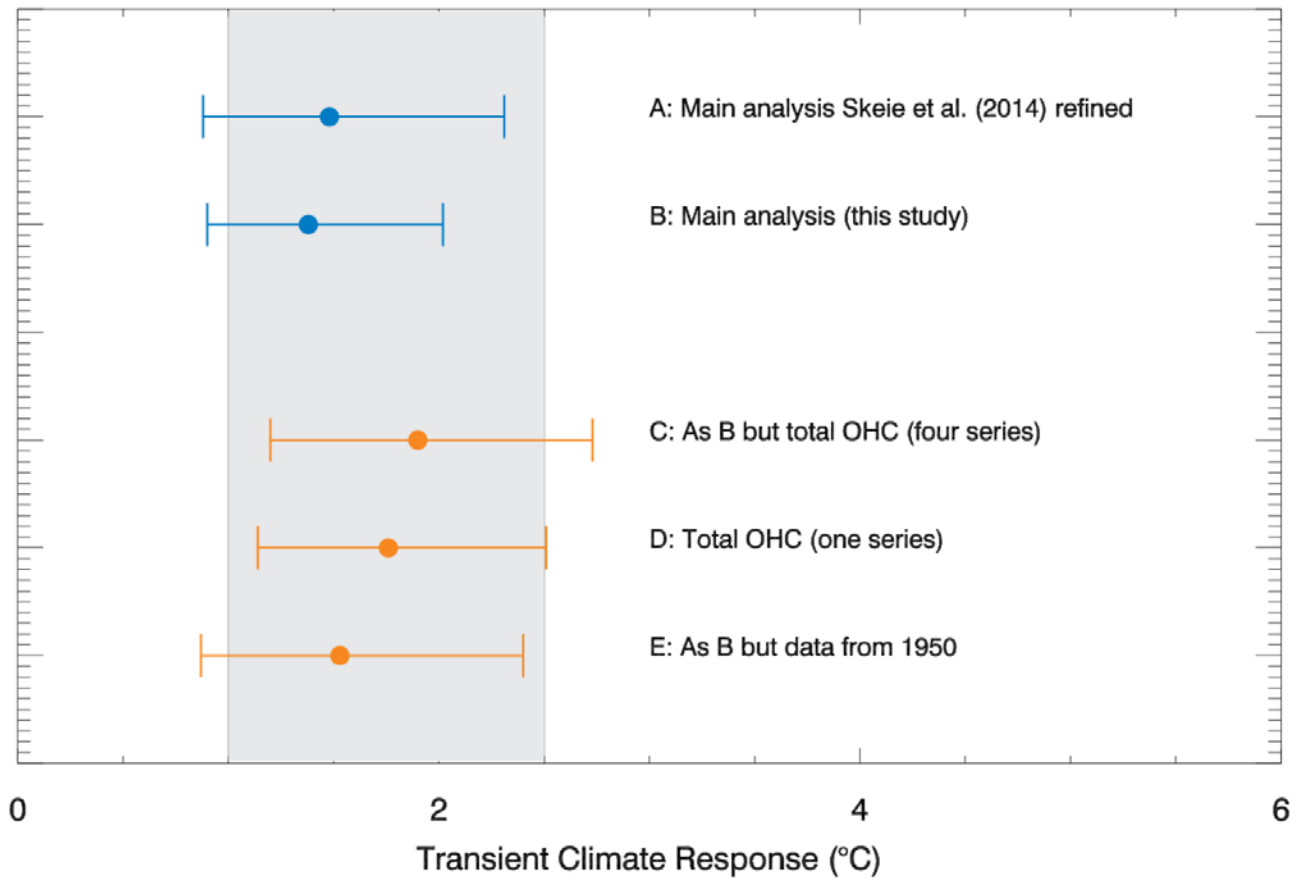

Figure S2. Posterior 90% C.I for TCR for the different analyses. The estimated posterior mean is indicated by a dot. The IPCC AR5 likely range (>66% probability) shown as gray shadings.

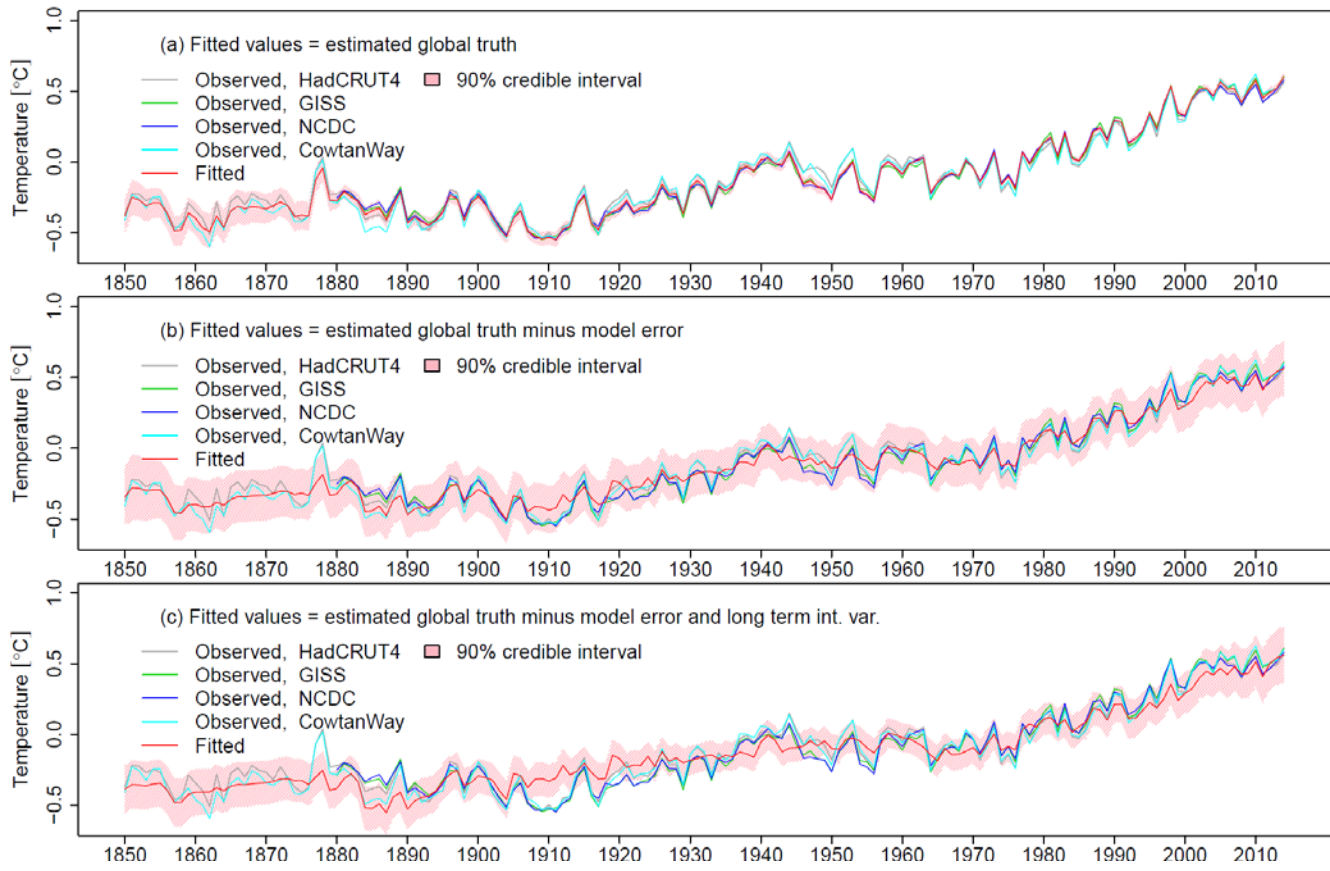

**Figure S3** Observed and fitted (posterior mean) values for GMST. The shaded areas show the 90% C.I. for fitted values. In a) the fitted values are the sum of the output from the deterministic SCM including model error and short- and long-term internal variability. In b) the fitted values are the sum of the output from the deterministic SCM and short- and long-term internal natural variability excluding the term for model error. In c) the fitted values are as presented in Fig. 2 i.e. the sum of the output from the deterministic SCM and the short-term internal variability excluding the terms for long-term internal variability and model error.

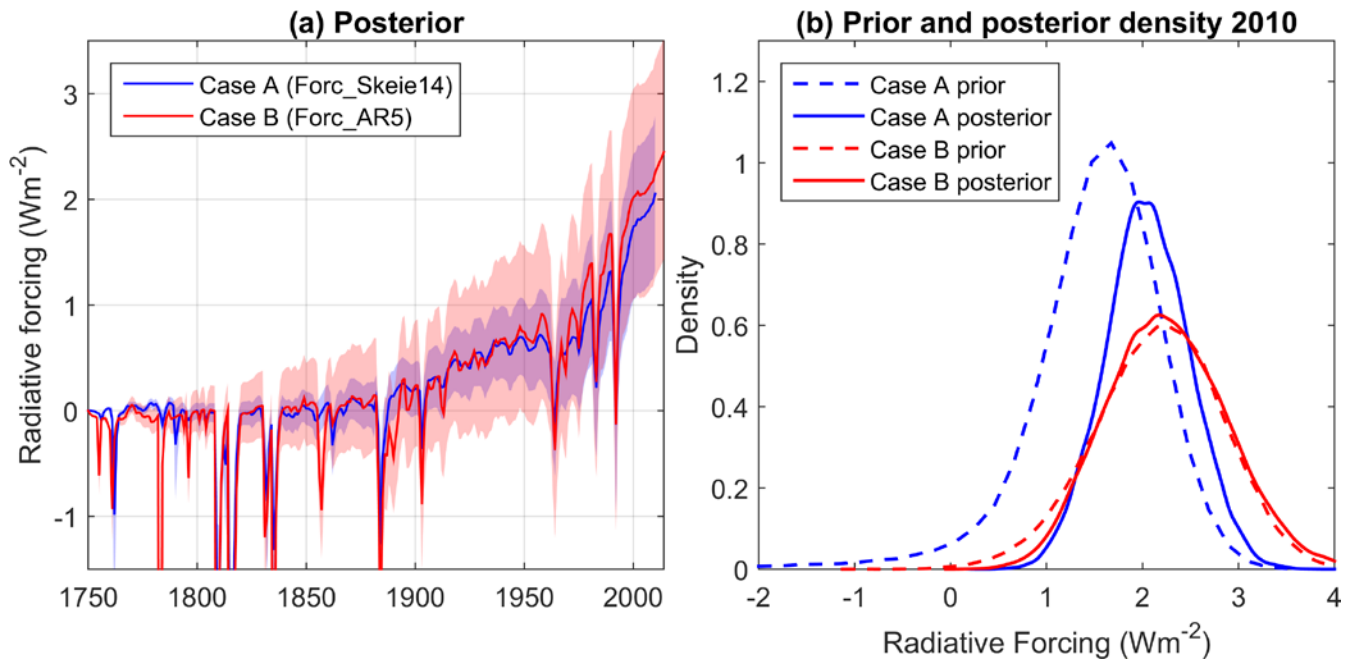

Figure S4. Posterior distribution of time series (a) and prior (dotted) and posterior (solid) probability density function (PDF) in 2010 (b) for total forcing. The shaded areas in (a) represent the 90% C.I.

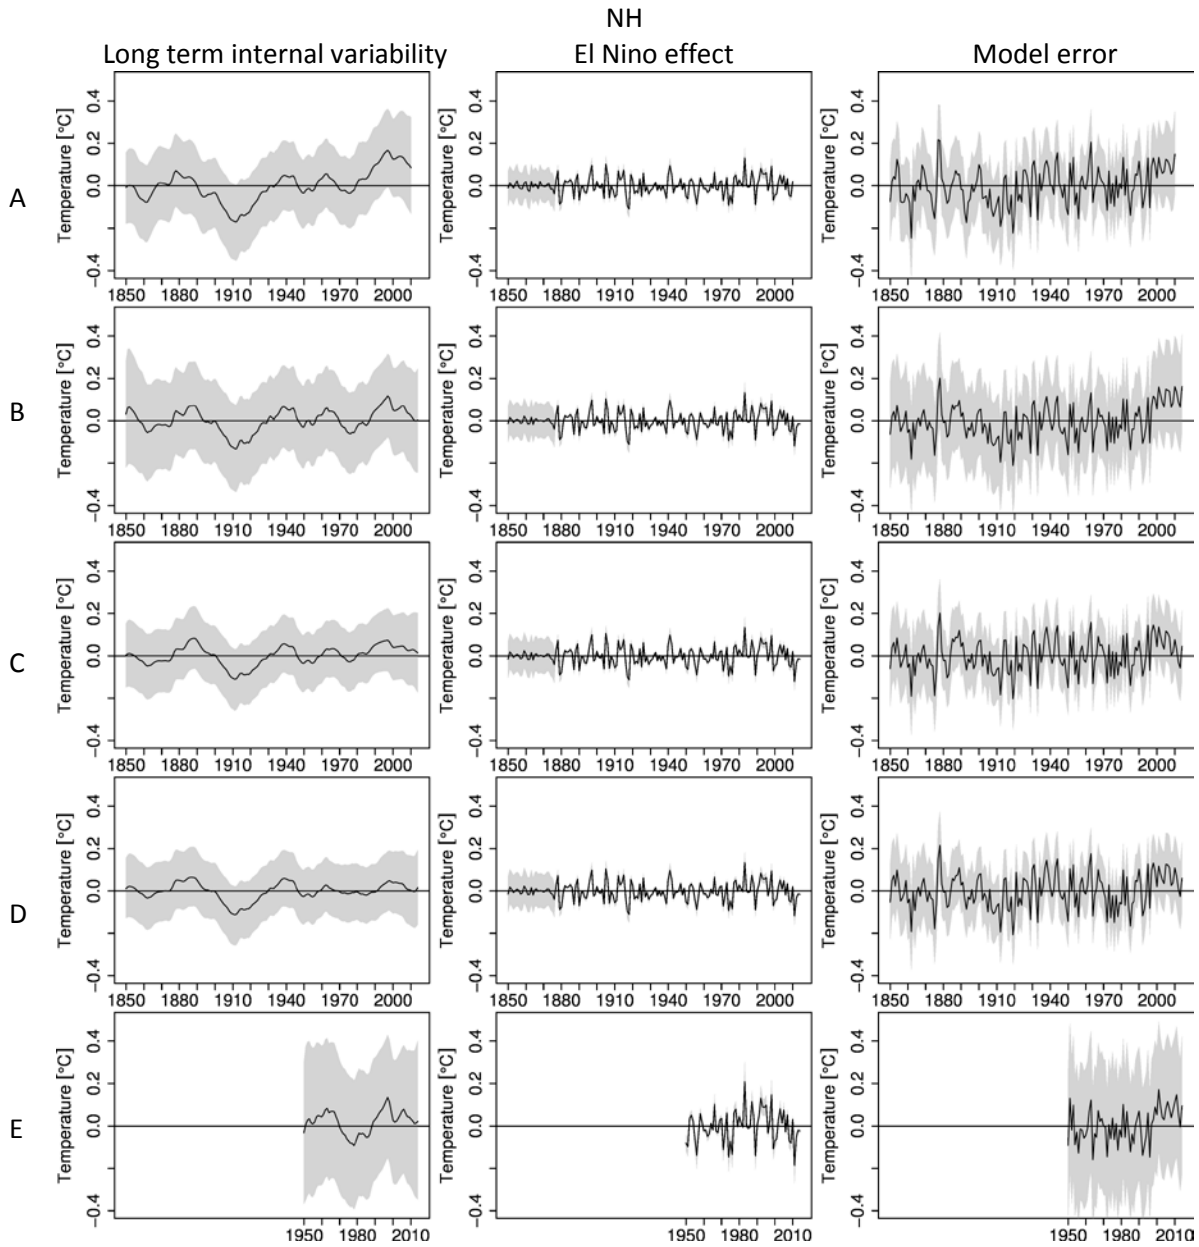

Figure S5a For all main cases (A-E) posterior estimates of the long-term internal variability term (left column), the ENSO term (middle column) and the model errors (right column) for the northern hemispheric temperature.



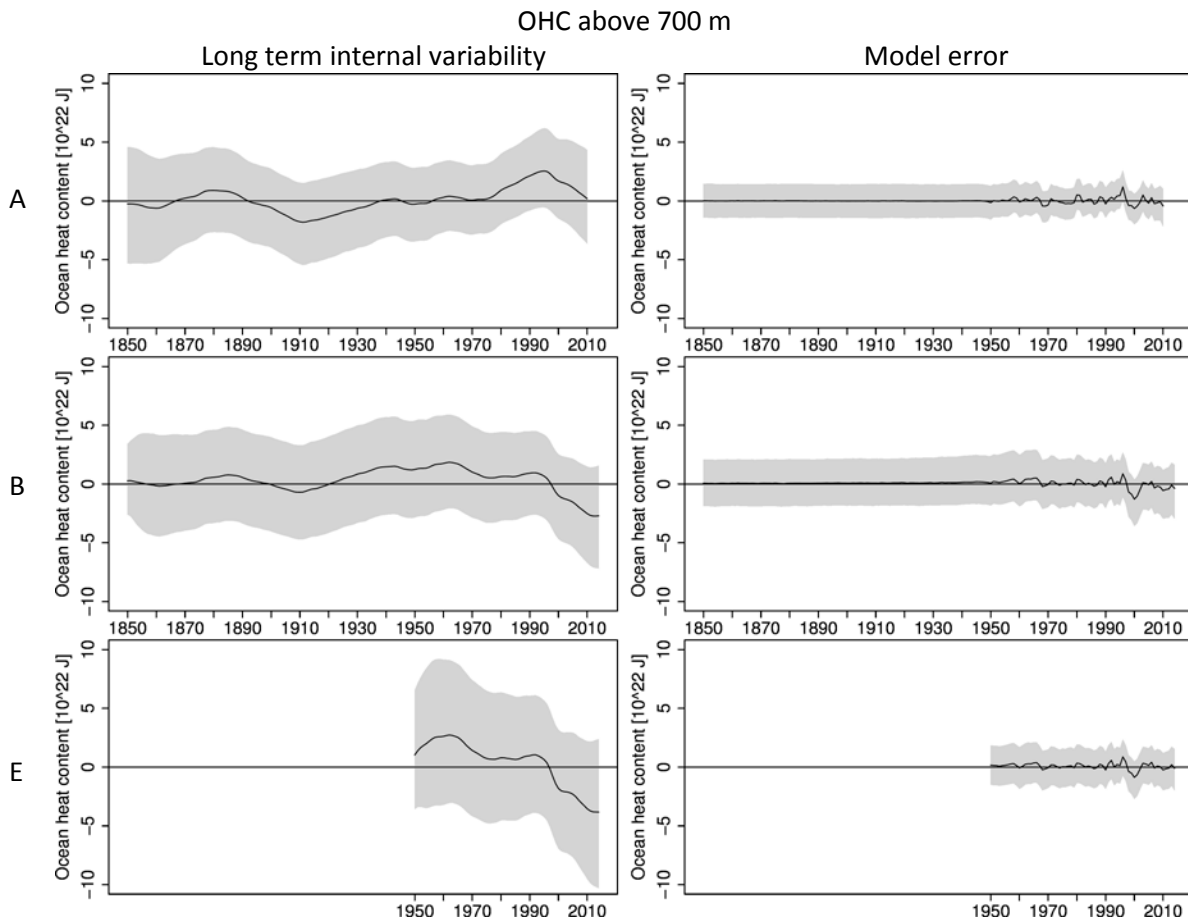

Figure S5c Same as Fig. S4a but for the long-term internal variability term (left column) and the model errors (right column) for the OHC above 700 meter for case A, B, and E.



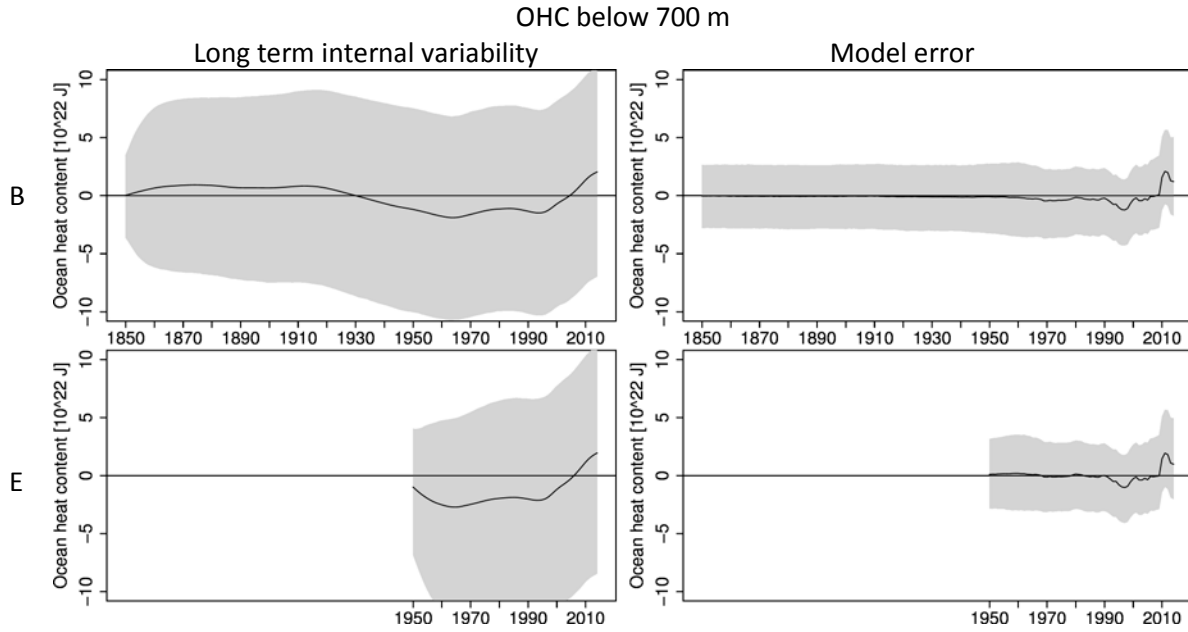

Figure S5d Same as Fig. S4c but for OHC below 700 meter for case B and E.

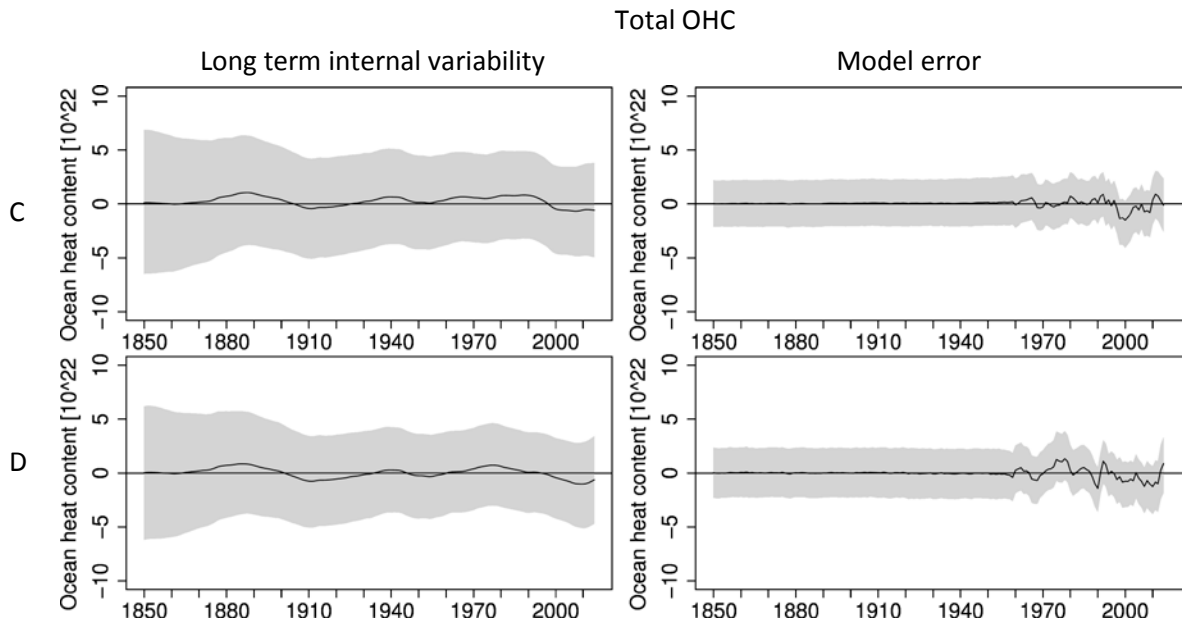

Figure S5e Same as Fig. S4c but for total OHC for case C and D.

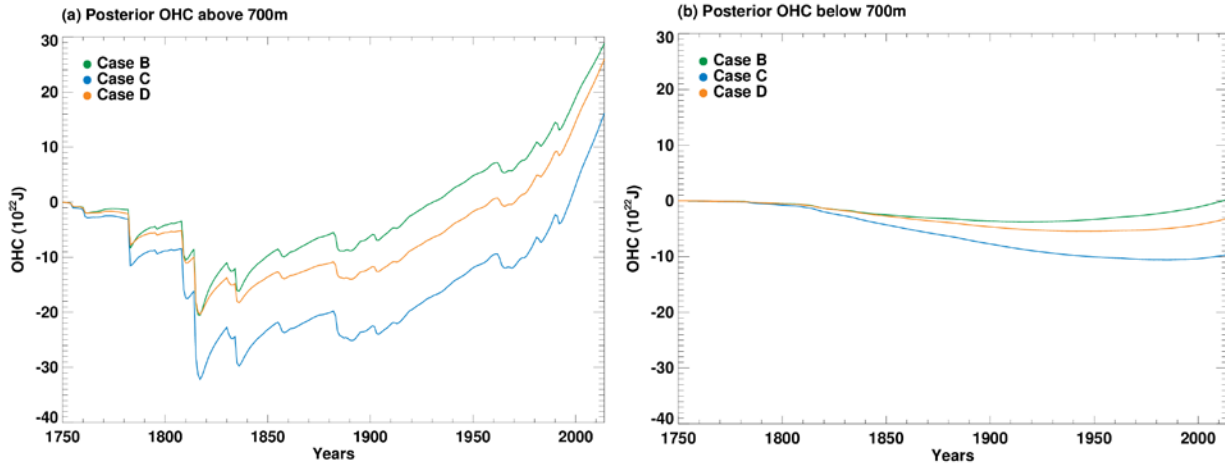

Figure S6. Posterior mean (solid lines) of the output from the deterministic EBC/UDM for OHC above 700 meter (a) and below 700 meter (b) for case B, C and D.

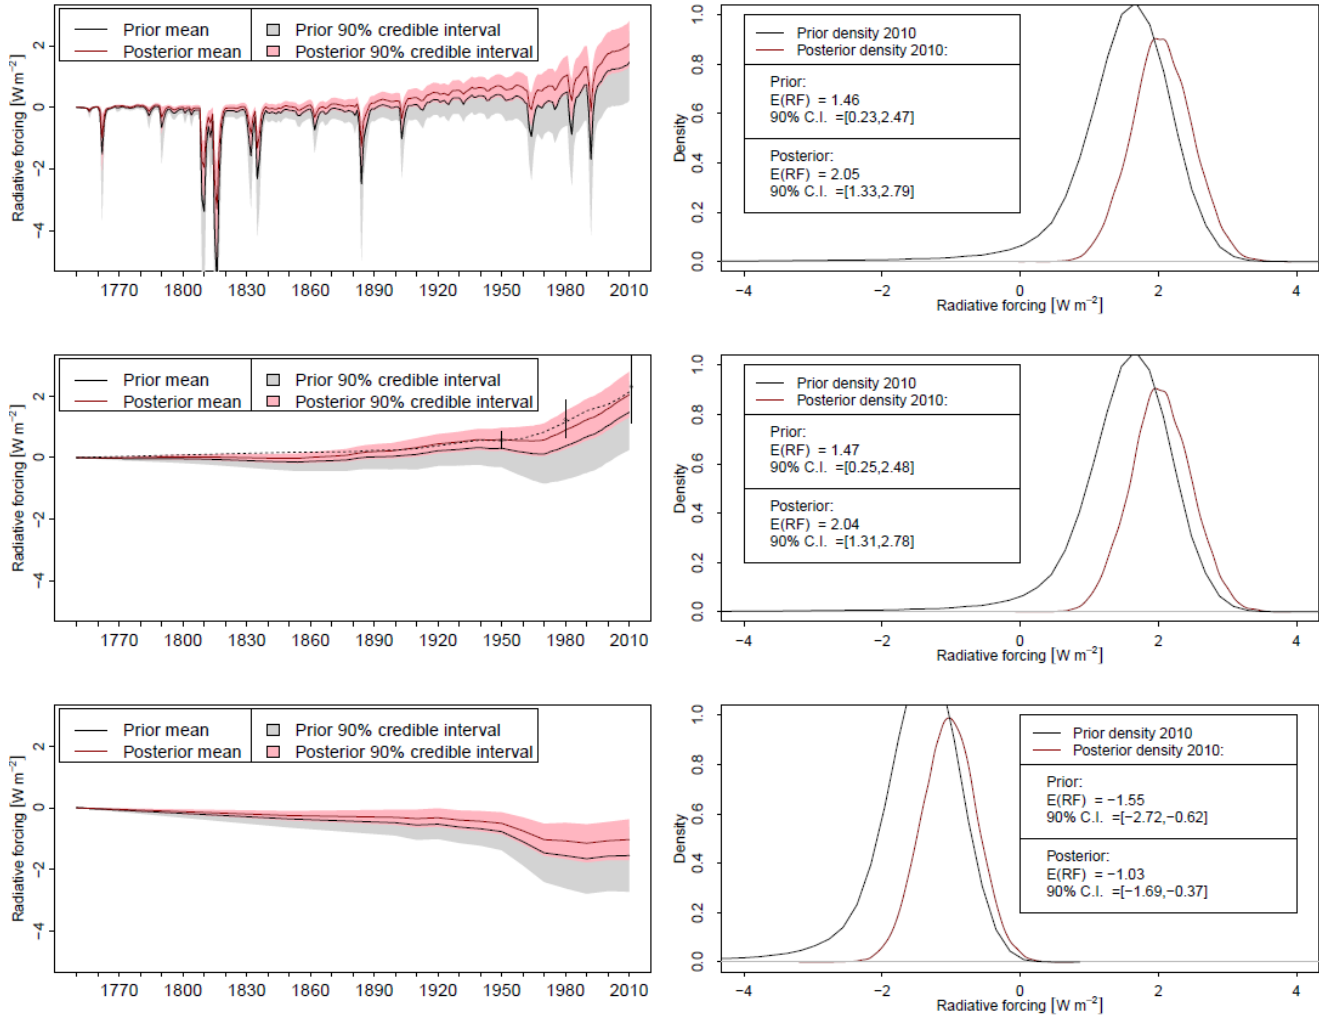

**Figure S7a.** For Case A the prior and posterior distribution of the RF time series and PDF of RF in 2010 for total RF (upper panel), anthropogenic RF (middle panel) and total aerosol effect (lower panel). Red color for the posterior distributions and black lines and grey shadings for the prior distribution.

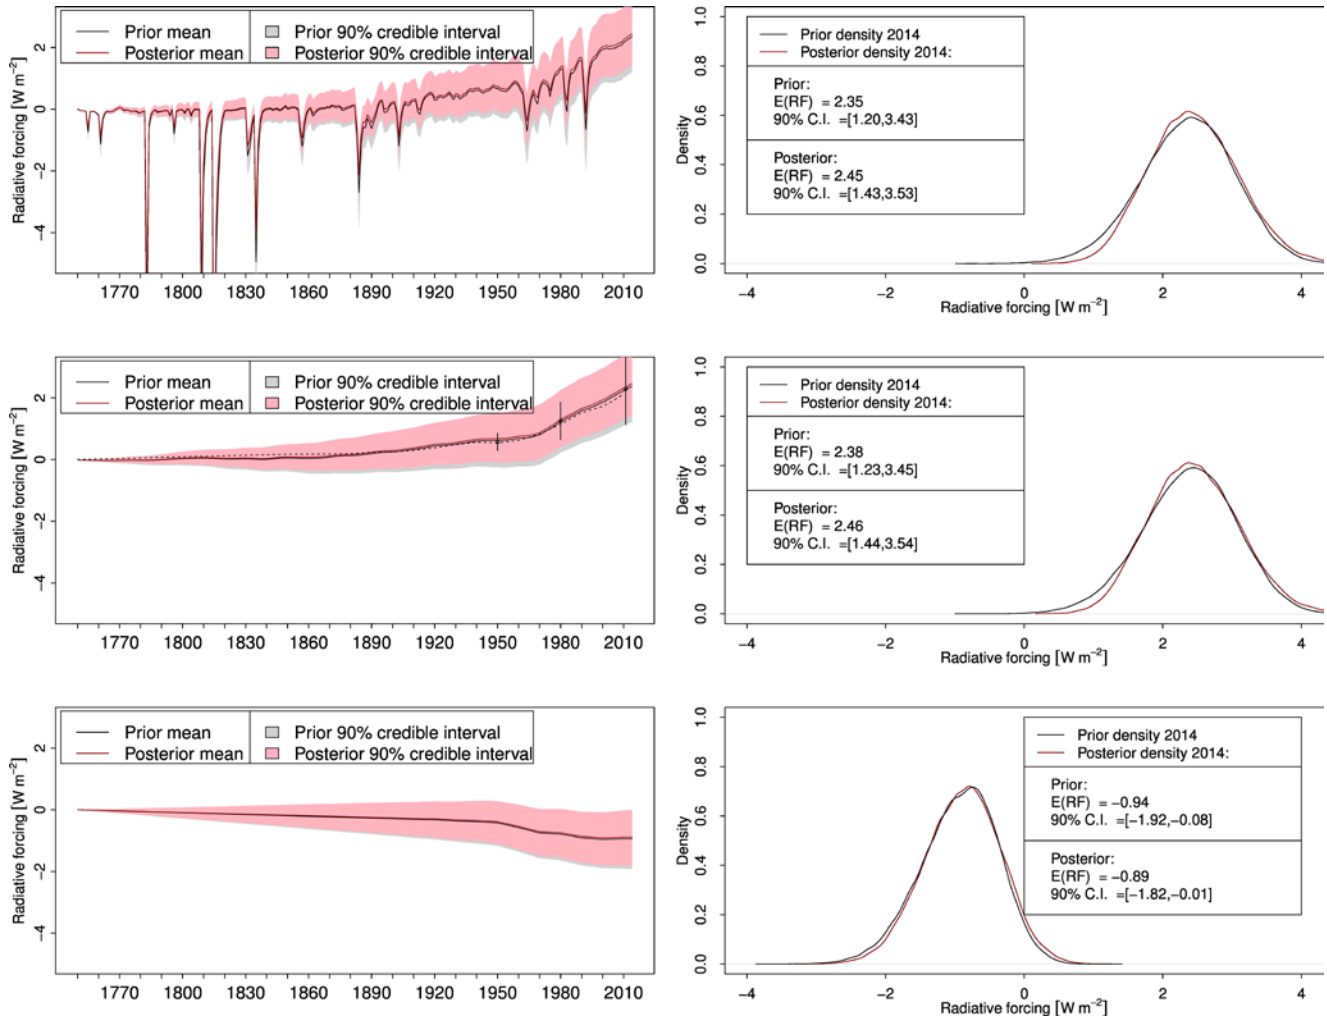

Figure S7b. As Fig S7a but for Case B and PDF of RF in 2014.

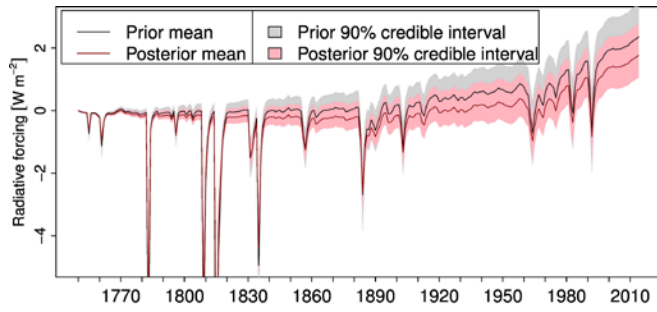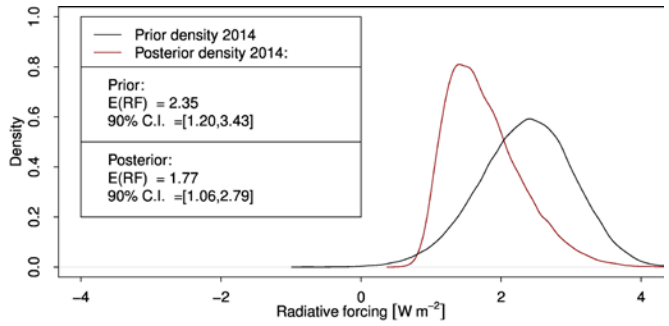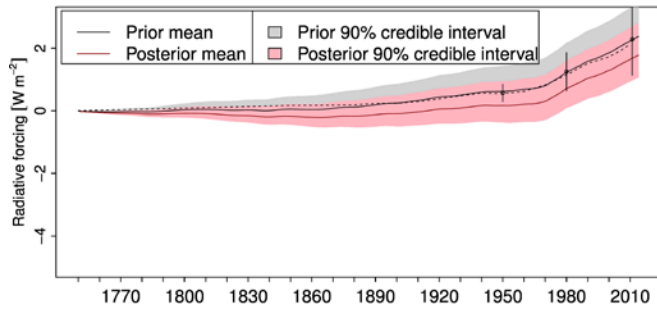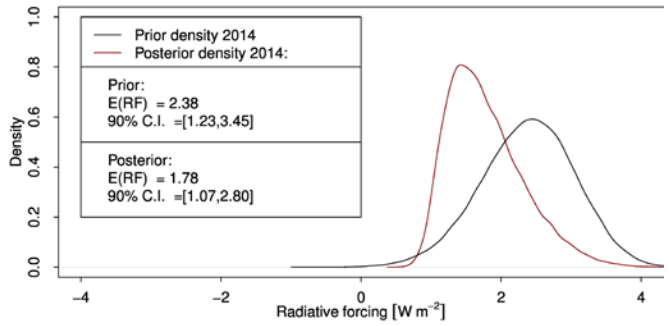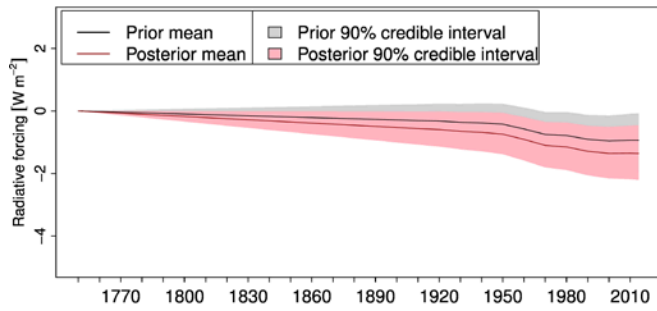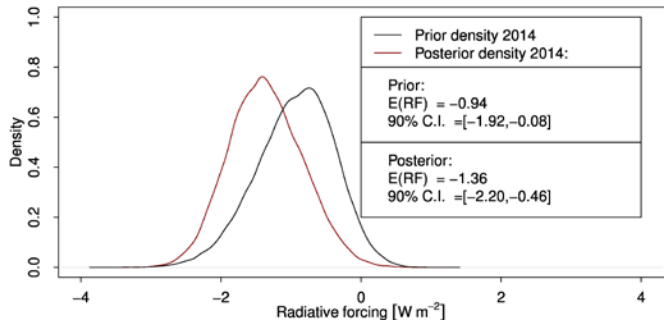

Figure S7c. As Fig S7b but for Case C.

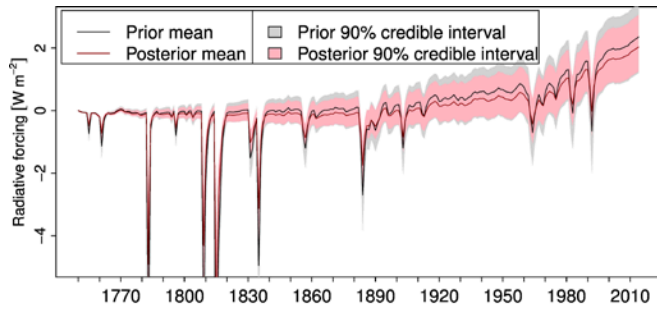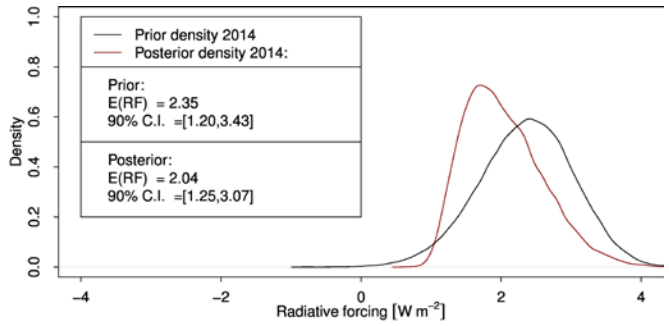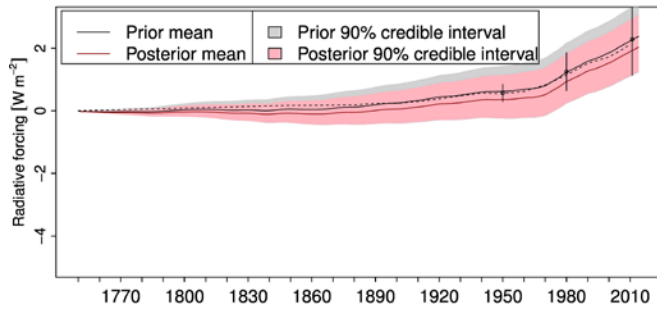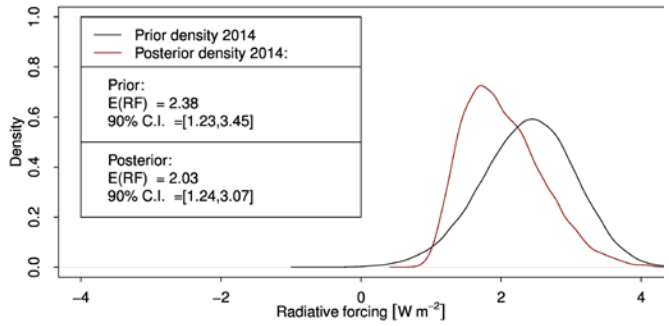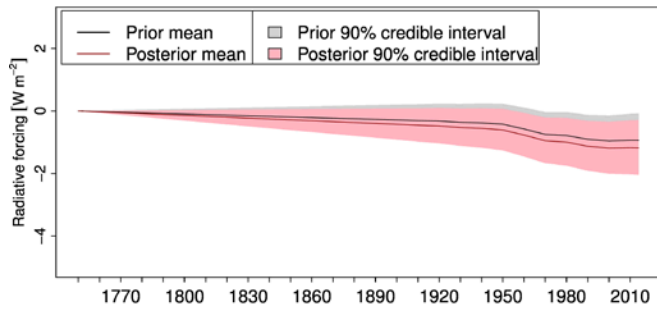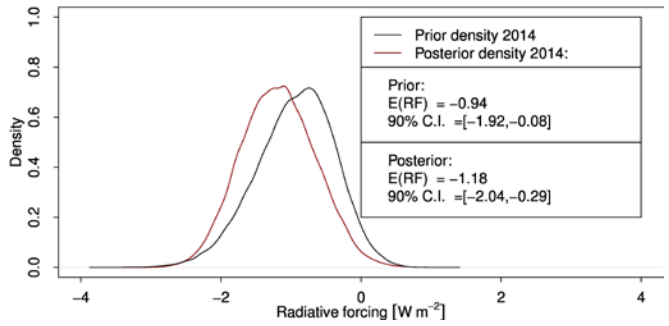

Figure S7d. As Fig S7b but for case D.

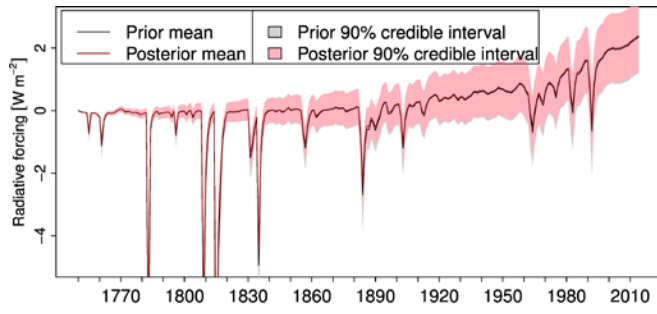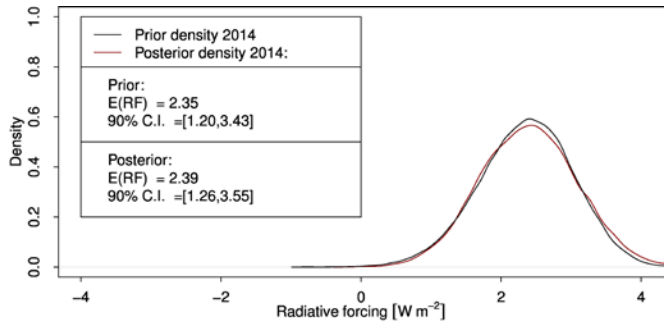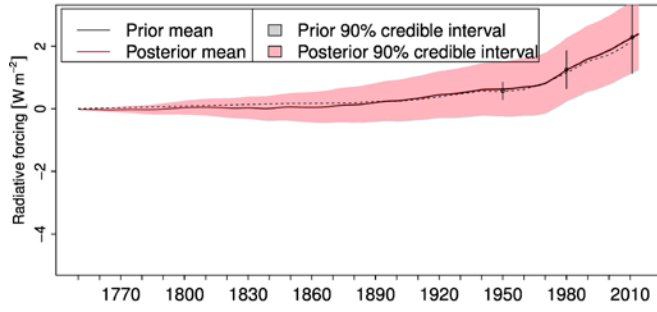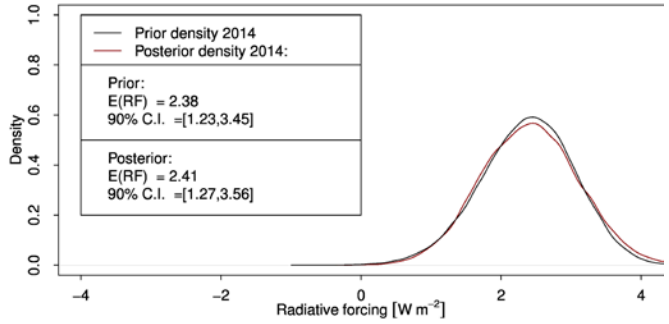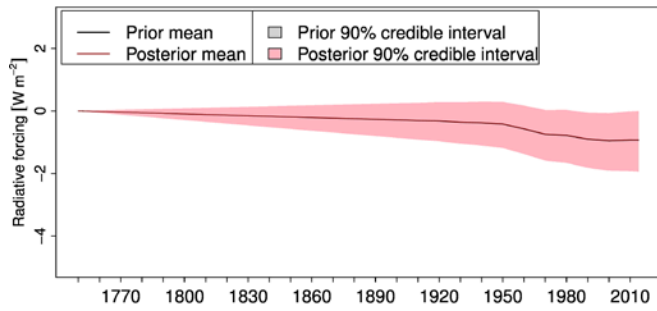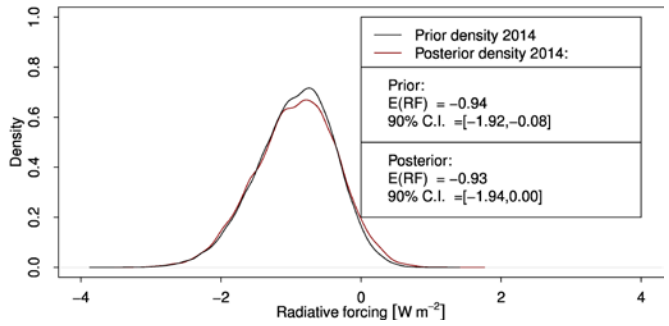

Figure S7e. As Fig S7b but for case E.

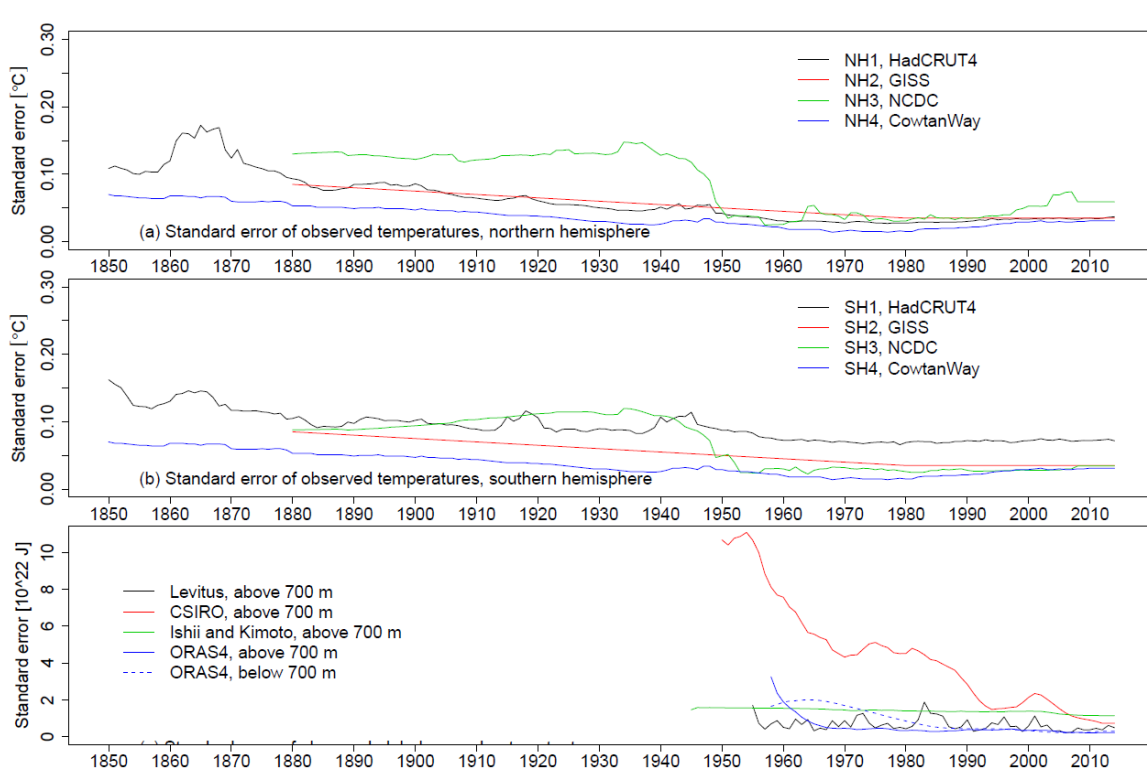

Figure S8. Reported standard errors of annual hemispheric temperature and ocean heat content data.

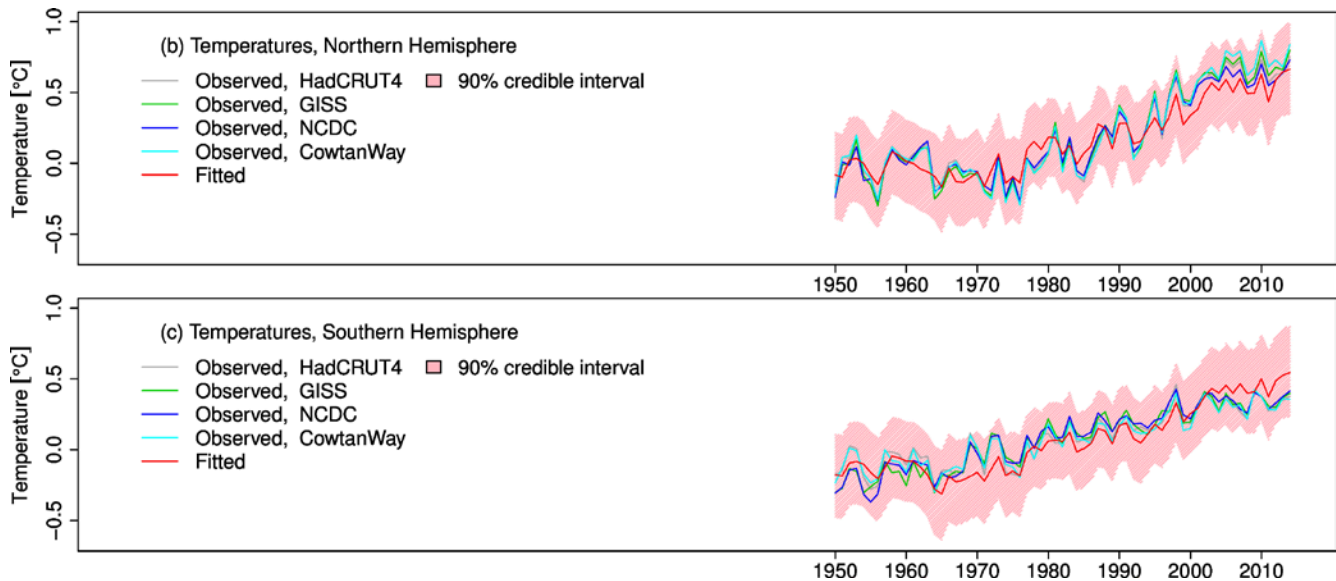

Figure S9. Observed and fitted (posterior mean) values for the hemispheric mean surface temperature series for case E (data from 1950). The shaded areas show the 90% C.I. for the sum of the output from the deterministic EBC/UDM and the term representing short-term internal natural variability (excluding the term for long-term internal natural variability and model error).



**Table S1.** List of forcing components included in Forc\_Skeie14 and Forc\_AR5

| Forcing components Forc_Skeie14                              | Forcing components Forc_AR5      |
|--------------------------------------------------------------|----------------------------------|
| Long-lived greenhouse gases (LLGHGs)                         | CO <sub>2</sub>                  |
| Tropospheric O <sub>3</sub>                                  | GHG Other*                       |
| Stratospheric O <sub>3</sub>                                 | O <sub>3</sub> (Tropospheric)    |
| Stratospheric H <sub>2</sub> O from CH <sub>4</sub>          | O <sub>3</sub> (Stratospheric)   |
| Direct aerosol effects: Sulphate                             | Aerosol (Total)                  |
| Direct aerosol effects: BC fossil fuel and biofuel (FFBF)    | LUC                              |
| Direct aerosol effects: OC FFBF + secondary organic aerosols | H <sub>2</sub> O (Stratospheric) |
| Direct aerosol effects: Biomass burning aerosols             | BC Snow                          |
| Direct aerosol effects: Nitrate                              | Contrails                        |
| Cloud albedo effect                                          | Solar irradiance                 |
| Cloud lifetime effect                                        | Volcanoes                        |
| Semi-direct aerosol effect                                   |                                  |
| Snow albedo effect                                           |                                  |
| Land use change                                              |                                  |
| Volcanoes (3 separate series)                                |                                  |
| Solar irradiance                                             |                                  |
